# Supplementary material for: Ansa-tris(allyl) complexes of alkali metals: tripodal analogues of cyclopentadienyl and ansa-metallocene ligands
Source: Royal Society of Chemistry journal article supplement (doi:10.1039/b712285c), 2007-01-01
Supplement: b712285c.pdf [file b712285c.pdf]

***Ansa-tris(allyl) complexes of alkali metals: tripodal analogues of  
cyclopentadienyl and *ansa*-metallocene ligands***

**Richard A. Layfield,<sup>\*,a</sup> Felipe García,<sup>b</sup> Julien Hannauer<sup>b</sup> and Simon M. Humphrey<sup>b</sup>**

**<sup>a</sup>School of Chemistry, The University of Manchester,  
Oxford Road, Manchester, M13 9PL, U.K.**

**<sup>b</sup>Department of Chemistry, University of Cambridge,  
Lensfield Road, Cambridge, CB2 1EW, U.K.**

**Electronic supplementary information – experimental and analytical details**

**General considerations.** All syntheses were carried out using conventional Schlenk-type techniques involving rigorous exclusion of air and moisture. Solvents were pre-dried over sodium wire before being rigorously dried by refluxing over sodium/potassium alloy (hexane) or sodium benzophenone (thf). Anhydrous SnCl<sub>2</sub> was purchased from Lancaster and used as supplied, and 1,3-*bis*(trimethylsilyl)allyl potassium was prepared according to a literature procedure.<sup>1</sup> NMR spectra were recorded on a Bruker DRX 500 NMR spectrometer equipped with a CryoProbe. Crystallographic studies were carried out using a Nonius Kappa CCD diffractometer.

**Synthesis of [1·thf].** A solution of 1,3-*bis*(trimethylsilyl)allyl potassium (0.67g, 3.0 mmol) in thf (10 ml) was added dropwise to a solution of SnCl<sub>2</sub> (0.19 g, 1.0 mmol) in thf (10ml) at -78°C. The reaction mixture was slowly warmed to room-temperature and then stirred for 2 hours to result in a bright yellow solution. The thf solvent was removed *in vacuo* to result in a sticky amber solid that was dissolved in hexane (10 ml) and filtered through Celite (P3). The hexane solution was reduced in volume to ca. 2 ml and stored at -15°C for 3 days, affording yellow, very-air sensitive crystals suitable for X-ray diffraction. Removal of the supernatant hexane solvent by syringe and drying *in vacuo* for ca. 30 minutes afforded **1**·thf (0.34 g, 43% isolated yield), melts 103-105°C to an amber oil. Anal. Calcd. for C<sub>31</sub>H<sub>71</sub>OKSi<sub>6</sub>Sn, C 47.36, H 9.10; found C 47.18, H 9.01 %. <sup>119</sup>Sn NMR ( $\delta$ ppm, 186.50 MHz, toluene-*d*<sub>8</sub>, 300.0 K, referenced to SnMe<sub>4</sub> in benzene-*d*<sub>6</sub>): -132.87 (br s). <sup>13</sup>C NMR ( $\delta$ ppm, 125.75 MHz, toluene-*d*<sub>8</sub>, 300.0 K, *J*/Hz, atom labels refer to those assigned in Figure 1 of the Communication Main Text): 127.78, C2, <sup>1</sup>*J*(C2-H2) not observed; 112.78, C3, <sup>1</sup>*J*(C3-H3) = 277; 68.00, thf; 39.67, C1, <sup>1</sup>*J*(<sup>13</sup>C-<sup>119</sup>Sn) = 1549.5, <sup>1</sup>*J*(<sup>13</sup>C-<sup>117</sup>Sn) = 1481.5, <sup>1</sup>*J*(<sup>13</sup>C-<sup>1</sup>H) = 195; 25.67, thf; 0.84, Me<sub>3</sub>Si; 0.07, Me<sub>3</sub>Si. <sup>1</sup>H NMR ( $\delta$ ppm, 500.05 MHz, toluene-*d*<sub>8</sub>, 300.0 K, *J*/Hz): 6.43, dd, 3H, H2, <sup>3</sup>*J*(H2-H3) = 18.0, <sup>3</sup>*J*(H2-H1) = 14.1; 4.42, d, 3H, H3; 3.57, m, 4H, thf; 1.43, m, 4H, thf; 1.20 d, 3H, H1; 0.42, 27H, Me<sub>3</sub>Si; 0.23, 27H, Me<sub>3</sub>Si.

**Synthesis of 2.** A mixture of allyltrimethylsilane (43.6 ml, 274 mmol) and thf (100 ml) was cooled to  $-78^{\circ}\text{C}$  and n-butyllithium (1.6 M, 171.5 ml, 274 mmol) was added dropwise over 1 hour. The reaction mixture was slowly warmed to room-temperature (approx. 293 K) and stirred for 16 hours. The resulting yellow solution of lithium allyltrimethylsilane was then cooled to  $-78^{\circ}\text{C}$  and  $\text{MeSiCl}_3$  (13.68 g, 91.5 mmol) added dropwise and the reaction mixture allowed to warm to room-temperature and stirred for 20 hours. Following removal of the thf solvent in vacuo, hexane (80 ml) was added and the resulting solution filtered (Celite, P3). The hexane solvent was then removed in vacuo and the resulting liquid distilled under reduced pressure to afford **2** as a colourless oil (27.3 g, 78%), bp  $107\text{-}109^{\circ}\text{C}/0.1$  mm Hg.  $^{13}\text{C}$  NMR ( $\delta$ /ppm, 125.75 MHz,  $\text{CDCl}_3$ , 300.0 K) 142.6  $\underline{\text{C}}\text{H}=\text{CH}(\text{SiMe}_3)$ ; 129.2,  $\text{CH}=\underline{\text{C}}\text{H}(\text{SiMe}_3)$ ; 24.7  $\text{MeSi}-\underline{\text{C}}\text{H}_2$ ; -1.031,  $\text{SiMe}_3$ ; -5.9,  $\underline{\text{Me}}\text{Si}$ .  $^1\text{H}$  NMR ( $\delta$ /ppm, 500.05 MHz,  $\text{CDCl}_3$ , 300.0 K,  $J/\text{Hz}$ ): 5.99, dt, 3H,  $\text{CH}_2-\underline{\text{C}}\text{H}=\text{CH}$ ,  $^3J = 18.4$  and  $7.8$ ; 5.47, dt, 3H,  $\text{CH}_2-\underline{\text{C}}\text{H}=\text{CH}(\text{SiMe}_3)$ ,  $^3J = 18.4$ ,  $^4J = 1.3$ ; 1.66, dd,  $\underline{\text{C}}\text{H}_2$ ; 0.03, s, 27H,  $\text{SiMe}_3$ ; -0.03, s, 3H,  $\text{MeSi}$ . Anal. Calcd. for  $\text{C}_{19}\text{H}_{42}\text{Si}_4$ , C 59.60, H 11.06; found C 59.45, H 11.05 %.

**Synthesis of [3·(tmeda)<sub>3</sub>].** A mixture of **2** (0.38 g, 1.0 mmol) and hexane (10 ml) was cooled to  $-78^{\circ}\text{C}$  and n-butyllithium (1.6M, 1.88 ml, 3.0 mmol) was added dropwise. The reaction mixture was warmed to room-temperature and stirred for 12 hours followed by the addition of tmeda (0.35 g, 3.0 mmol) and further stirring for 1 hour to afford a pale red solution. The solution was filtered (Celite, P3), reduced in volume to ca. 2 ml and stored at  $-15^{\circ}\text{C}$  overnight to afford pink crystals of [3·(tmeda)<sub>3</sub>] (0.24 g, 32% isolated yield) mp  $125\text{-}128^{\circ}\text{C}$ .  $^{13}\text{C}$  NMR ( $\delta$ /ppm, 125.75 MHz,  $\text{CDCl}_3$ , 300.0 K, atom labels refer to those assigned in Figure 4 of the Communication Main Text): 128.2, C9; 70.1, C10; 61.5, C8; 46,  $\text{NMe}_2$ , broad; 56.5,  $\text{CH}_2\text{N}$ , broad.  $^1\text{H}$  NMR ( $\delta$ /ppm, 500.05 MHz,  $\text{CDCl}_3$ , 300.0 K,  $J/\text{Hz}$ ): 7.18, dd, 1H, H9,  $^3J(\text{H9-H10}) = 16.8$ ,  $^3J(\text{H9-H8}) = 10.9$ ; 6.98, t, 1H, H3/3A,  $^3J = 15.4$ ; 6.86, t, 1H, H3/H3A,  $^3J = 15.3$ ; 3.58, d, 1H,  $^3J = 16.0$ ; 3.44, d, 1H,  $^3J = 15.6$ ; 3.35, d, 1H, H10,  $^3J = 16.9$ ; 3.02, d, 1H,  $^3J = 14.7$ ; 2.63, d, 1H, H8,  $^3J = 10.9$ ; 2.52, d, 1H,  $^3J = 14.8$ ; 2.35-2.09,

broad, overlapping multiplets, 48H,  $3 \times \text{Me}_2\text{NCH}_2\text{CH}_2\text{NMe}_2$ ); 0.54, (s, 3H, MeSi); 0.44, 0.43, 0.41  
( $3 \times$  s,  $3 \times$  9H,  $3 \times$  Me<sub>3</sub>Si). Anal. Calcd. for C<sub>37</sub>H<sub>87</sub>Li<sub>3</sub>N<sub>6</sub>Si<sub>4</sub>, C 59.31, H 11.70, N 11.22; found C  
58.91, H 11.20, N 11.38 %.

### Crystallographic details for compounds **1·thf** and **[3·(tmeda)<sub>3</sub>]**

Crystals were mounted on thin glass fibres using perfluoropolyether oil and frozen in situ in a flow of cold nitrogen gas from a Cryostream instrument. Data were collected using an Enraf Nonius Kappa CCD diffractometer using monochromated Mo K $\alpha$  radiation ( $\lambda = 0.71073 \text{ \AA}$ ). Cell refinement and data reduction was performed using the HKL SCALEPACK & DENZO<sup>2</sup> and COLLECT<sup>3</sup> utilities. Absorption corrections were made based on  $\psi$ - and  $\omega$ -scans using the SORTAV<sup>4</sup> program. Structures were solved using direct methods and refined on  $F^2$  using the program SIR-92<sup>5</sup> and then refined using SHELXTL-97.<sup>6</sup> All non-hydrogen atoms were refined anisotropically for all structures. For **[1·thf]** and **[3·(tmeda)<sub>3</sub>]**, the allylic hydrogen atoms were located directly in the electron peak difference maps and were allowed to refine freely. All other hydrogen atoms were fixed manually on idealized positions, with values of  $U_{\text{iso}}$  set to 1.5 times the carrier atom. In **[1·thf]**, the thf solvent molecule was disordered about a 3-fold axis, with the coordinating O-atom located at  $[-1/3, +1/3, l]$ ; hydrogen atoms were not assigned and compensatory alterations were made to the final structural formula, as required for a single C<sub>4</sub>H<sub>8</sub>O unit. In **[3·(tmeda)<sub>3</sub>]** the positions of carbon atoms in the tmeda backbone were found to be disordered over two positions (not shown in Figure 4). Due to the inherent disorder in the tmeda ligand containing C19 and C20, hydrogen atoms on these parent atoms have been removed from the structure and corrected for in the .cif file.

**Table S1. Crystal data and structure refinement for 1-thf.**

|                                      |                                                                    |                        |
|--------------------------------------|--------------------------------------------------------------------|------------------------|
| Empirical formula                    | C <sub>31</sub> H <sub>71</sub> KOSi <sub>6</sub> Sn               |                        |
| Formula weight                       | 786.22                                                             |                        |
| Temperature                          | 180(2) K                                                           |                        |
| Wavelength                           | 0.71073 Å                                                          |                        |
| Crystal system                       | Rhombohedral                                                       |                        |
| Space group                          | R3c                                                                |                        |
| Unit cell dimensions                 | $a = 17.4815(9)$ Å                                                 | $\alpha = 90^\circ$ .  |
|                                      | $b = 17.4815(9)$ Å                                                 | $\beta = 90^\circ$ .   |
|                                      | $c = 27.596(2)$ Å                                                  | $\gamma = 120^\circ$ . |
| Volume                               | 7303.5(8) Å <sup>3</sup>                                           |                        |
| Z                                    | 6                                                                  |                        |
| Density (calculated)                 | 1.029 Mg/m <sup>3</sup>                                            |                        |
| Absorption coefficient               | 0.774 mm <sup>-1</sup>                                             |                        |
| $F(000)$                             | 2388                                                               |                        |
| Crystal size                         | 0.17 x 0.12 x 0.12 mm <sup>3</sup>                                 |                        |
| Theta range for data collection      | 3.64 to 20.59°.                                                    |                        |
| Index ranges                         | $-17 \leq l \leq 16$ , $-17 \leq k \leq 17$ , $-27 \leq l \leq 27$ |                        |
| Reflections collected                | 7480                                                               |                        |
| Independent reflections              | 1622 [ $R(\text{int}) = 0.0517$ ]                                  |                        |
| Completeness to theta = 20.59°       | 99.2 %                                                             |                        |
| Absorption correction                | Semi-empirical from equivalents                                    |                        |
| Max. and min. transmission           | 0.986 and 0.854                                                    |                        |
| Refinement method                    | Full-matrix least-squares on $F^2$                                 |                        |
| Data / restraints / parameters       | 1622 / 1 / 136                                                     |                        |
| Goodness-of-fit on $F^2$             | 1.089                                                              |                        |
| Final R indices [ $I > 2\sigma(I)$ ] | $R1 = 0.0312$ , $wR2 = 0.0698$                                     |                        |
| R indices (all data)                 | $R1 = 0.0483$ , $wR2 = 0.0789$                                     |                        |
| Absolute structure parameter         | -0.03(4)                                                           |                        |
| Largest diff. peak and hole          | 0.204 and -0.143 e.Å <sup>-3</sup>                                 |                        |

**Table S2. Crystal data and structure refinement for 3·(tmeda)<sub>3</sub>**

|                                                     |                                                                                |                       |
|-----------------------------------------------------|--------------------------------------------------------------------------------|-----------------------|
| Empirical formula                                   | C <sub>37</sub> H <sub>87</sub> Li <sub>3</sub> N <sub>6</sub> Si <sub>4</sub> |                       |
| Formula weight                                      | 749.31                                                                         |                       |
| Temperature                                         | 180(2) K                                                                       |                       |
| Wavelength                                          | 0.71073 Å                                                                      |                       |
| Crystal system                                      | Tetragonal                                                                     |                       |
| Space group                                         | <i>P4<sub>2</sub>/nmc</i>                                                      |                       |
| Unit cell dimensions                                | <i>a</i> = 33.6787(3) Å                                                        | $\alpha = 90^\circ$ . |
|                                                     | <i>b</i> = 33.6787(3) Å                                                        | $\beta = 90^\circ$ .  |
|                                                     | <i>c</i> = 11.17300(10) Å                                                      | $\gamma = 90^\circ$ . |
| Volume                                              | 12673.0(2) Å <sup>3</sup>                                                      |                       |
| <i>Z</i>                                            | 8                                                                              |                       |
| Density (calculated)                                | 0.798 Mg/m <sup>3</sup>                                                        |                       |
| Absorption coefficient                              | 0.117 mm <sup>-1</sup>                                                         |                       |
| <i>F</i> (000)                                      | 3376                                                                           |                       |
| Crystal size                                        | 0.37 x 0.14 x 0.14 mm <sup>3</sup>                                             |                       |
| Theta range for data collection                     | 3.53 to 25.00°.                                                                |                       |
| Index ranges                                        | -40 ≤ <i>h</i> ≤ 35, -29 ≤ <i>k</i> ≤ 40, -13 ≤ <i>l</i> ≤ 13                  |                       |
| Reflections collected                               | 54441                                                                          |                       |
| Independent reflections                             | 5735 [ <i>R</i> (int) = 0.0579]                                                |                       |
| Completeness to theta = 25.00°                      | 98.9 %                                                                         |                       |
| Absorption correction                               | Semi-empirical from equivalents                                                |                       |
| Max. and min. transmission                          | 0.977 and 0.855                                                                |                       |
| Refinement method                                   | Full-matrix least-squares on <i>F</i> <sup>2</sup>                             |                       |
| Data / restraints / parameters                      | 5735 / 0 / 268                                                                 |                       |
| Goodness-of-fit on <i>F</i> <sup>2</sup>            | 1.107                                                                          |                       |
| Final <i>R</i> indices [ <i>I</i> > 2σ( <i>I</i> )] | <i>R</i> 1 = 0.0890, <i>wR</i> 2 = 0.2242                                      |                       |
| <i>R</i> indices (all data)                         | <i>R</i> 1 = 0.1116, <i>wR</i> 2 = 0.2374                                      |                       |
| Largest diff. peak and hole                         | 0.528 and -0.287 e.Å <sup>-3</sup>                                             |                       |

### **References**

1. Fernández-Galán, R.; Hitchcock, P. B.; Lappert, M. F.; Antiñolo, A.; Rodríguez, A. M. *J. Chem. Soc., Dalton Trans.*, 2000, 1743.
2. Z. Otwinowski and W. Minor, HKL SCALEPACK, *Methods in Enzymology*, **Vol 276**, Macromolecular Crystallography, Part A, Eds. C. W. Carter Jr. and R. M. Sweet, New York: Academic Press, 1997, 307.
3. Nonius COLLECT, Nonius BV, Delft, The Netherlands.
4. R. H. Blessing, SORTAV, *Acta. Cryst.* 1995, **A51**, 33.
5. A. Altamore, M. C. Burla, G. Camalli, G. Cascarano, C. Giacovazzo, A. Gualiardi and G. Polidori, *J. Appl. Cryst.* 1994, **27**, 435.
6. G. M. Sheldrick, SHELXTL Version 6.10, Bruker AXS Inc, Madison, Wisconsin, 1997.
